# Supplementary material
Source: PubMed Central journal article supplement (PMC4570581)
Supplement: supp_kxv017_kxv017supp.pdf [file supp_kxv017_kxv017supp.pdf]

# Supplementary material to “Two-stage Biomarker Panel Study and Estimation Allowing Early Termination for Futility”

SHANSHAN ZHAO\*, YINGYE ZHENG, ROSS L. PRENTICE,

*Public Health Sciences Division, Fred Hutchinson Cancer Research Center, Seattle, Washington  
98109, U.S.A*

ZIDING FENG

*Department of Biostatistics, University of Texas MD Anderson Cancer Center, Houston, Texas  
77030, U.S.A*

szhao@fhcrc.org

[*Received June 15, 2014; revised March 18, 2015;* ]

\*To whom correspondence should be addressed.

| $k$ | $n$                      | Fixed Sample<br>$\hat{\beta}$ | Koopmeiners & Vogel<br>$\hat{\beta}$ | $\hat{\beta}_{all}$               | Two-Stage Design with $m = n/2$<br>$\hat{\beta}_{s2}$ | $\hat{\beta}_{cond}$     |
|-----|--------------------------|-------------------------------|--------------------------------------|-----------------------------------|-------------------------------------------------------|--------------------------|
| 2   | 1600                     | (0.50, 1.01)                  | (0.50, 1.01)                         | $\gamma_0 = 0.55$<br>(0.50, 1.01) | (0.51, 1.01)                                          | (0.51, 1.01)             |
|     | 800                      | (0.51, 1.01)                  | (0.51, 1.01)                         | (0.50, 1.02)                      | (0.51, 1.03)                                          | (0.51, 1.03)             |
|     | 400                      | (0.52, 1.01)                  | (0.52, 1.02)                         | (0.51, 1.03)                      | (0.52, 1.06)                                          | (0.51, 1.03)             |
|     | 200                      | (0.56, 1.09)                  | (0.57, 1.09)                         | (0.54, 1.06)                      | (0.54, 1.11)                                          | (0.53, 1.08)             |
|     | 1600                     | (0.40, 0.51, 0.49, 0.50)      | (0.40, 0.51, 0.49, 0.50)             | (0.40, 0.51, 0.51, 0.51)          | (0.40, 0.51, 0.51, 0.51)                              | (0.40, 0.51, 0.51, 0.51) |
|     | 800                      | (0.40, 0.53, 0.51, 0.53)      | (0.41, 0.53, 0.51, 0.54)             | (0.41, 0.51, 0.51, 0.51)          | (0.42, 0.52, 0.52, 0.52)                              | (0.42, 0.51, 0.51, 0.52) |
| 400 | (0.46, 0.54, 0.50, 0.54) | (0.47, 0.54, 0.51, 0.54)      | (0.42, 0.52, 0.52, 0.52)             | (0.44, 0.53, 0.55, 0.54)          | (0.44, 0.54, 0.55, 0.54)                              |                          |
| 200 | (0.39, 0.55, 0.55, 0.54) | (0.39, 0.56, 0.53, 0.55)      | (0.43, 0.54, 0.54, 0.54)             | (0.47, 0.61, 0.59, 0.60)          | (0.46, 0.60, 0.59, 0.61)                              |                          |
| 4   | 1600                     | (0.40, 0.51, 0.49, 0.50)      | (0.40, 0.51, 0.49, 0.50)             | $\gamma_0 = 0.59$<br>(0.51, 1.01) | (0.51, 1.01)                                          | (0.51, 1.01)             |
|     | 800                      | (0.51, 1.01)                  | (0.51, 1.01)                         | (0.51, 1.03)                      | (0.51, 1.03)                                          | (0.51, 1.03)             |
|     | 400                      | (0.52, 1.03)                  | (0.52, 1.04)                         | (0.52, 1.04)                      | (0.54, 1.06)                                          | (0.53, 1.06)             |
|     | 200                      | (0.53, 1.09)                  | (0.54, 1.08)                         | (0.54, 1.10)                      | (0.54, 1.14)                                          | (0.54, 1.12)             |
|     | 1600                     | (0.40, 0.51, 0.49, 0.50)      | (0.40, 0.51, 0.49, 0.50)             | (0.40, 0.51, 0.51, 0.51)          | (0.41, 0.51, 0.51, 0.52)                              | (0.41, 0.51, 0.51, 0.51) |
|     | 800                      | (0.40, 0.53, 0.51, 0.53)      | (0.40, 0.54, 0.51, 0.53)             | (0.41, 0.51, 0.51, 0.51)          | (0.42, 0.52, 0.52, 0.52)                              | (0.42, 0.52, 0.51, 0.52) |
| 400 | (0.46, 0.54, 0.50, 0.54) | (0.47, 0.54, 0.51, 0.54)      | (0.42, 0.52, 0.52, 0.51)             | (0.43, 0.53, 0.54, 0.54)          | (0.44, 0.54, 0.54, 0.54)                              |                          |
| 200 | (0.39, 0.55, 0.55, 0.54) | (0.40, 0.52, 0.56, 0.55)      | (0.43, 0.54, 0.54, 0.54)             | (0.47, 0.59, 0.58, 0.60)          | (0.47, 0.59, 0.58, 0.59)                              |                          |
| 2   | 1600                     | (0.50, 1.01)                  | (0.50, 1.01)                         | $\gamma_0 = 0.65$<br>(0.51, 1.02) | (0.51, 1.01)                                          | (0.51, 1.01)             |
|     | 800                      | (0.51, 1.01)                  | (0.52, 1.00)                         | (0.51, 1.02)                      | (0.51, 1.03)                                          | (0.51, 1.03)             |
|     | 400                      | (0.52, 1.01)                  | (0.51, 0.98)                         | (0.52, 1.04)                      | (0.52, 1.06)                                          | (0.52, 1.07)             |
|     | 200                      | (0.56, 1.09)                  | (0.53, 1.12)                         | (0.54, 1.06)                      | (0.56, 1.11)                                          | (0.56, 1.12)             |
|     | 1600                     | (0.40, 0.51, 0.49, 0.50)      | (0.41, 0.51, 0.49, 0.50)             | (0.40, 0.51, 0.51, 0.51)          | (0.41, 0.51, 0.51, 0.52)                              | (0.41, 0.51, 0.51, 0.51) |
|     | 800                      | (0.40, 0.53, 0.51, 0.53)      | (0.40, 0.54, 0.50, 0.53)             | (0.41, 0.51, 0.51, 0.51)          | (0.42, 0.52, 0.52, 0.52)                              | (0.42, 0.52, 0.51, 0.52) |
| 400 | (0.46, 0.54, 0.50, 0.54) | (0.45, 0.54, 0.51, 0.55)      | (0.42, 0.52, 0.52, 0.52)             | (0.43, 0.53, 0.54, 0.53)          | (0.42, 0.54, 0.54, 0.52)                              |                          |
| 200 | (0.39, 0.55, 0.55, 0.54) | (0.44, 0.52, 0.55, 0.54)      | (0.43, 0.53, 0.53, 0.53)             | (0.47, 0.60, 0.58, 0.59)          | (0.46, 0.57, 0.58, 0.60)                              |                          |
| 4   | 1600                     | (0.50, 1.01)                  | (0.52, 1.03)                         | $\gamma_0 = 0.70$<br>(0.50, 1.01) | (0.51, 1.01)                                          | (0.51, 1.01)             |
|     | 800                      | (0.51, 1.01)                  | (0.50, 1.04)                         | (0.50, 1.02)                      | (0.51, 1.03)                                          | (0.51, 1.03)             |
|     | 400                      | (0.52, 1.01)                  | (0.49, 1.05)                         | (0.52, 1.05)                      | (0.52, 1.06)                                          | (0.53, 1.08)             |
|     | 200                      | (0.56, 1.09)                  | (0.54, 1.11)                         | (0.54, 1.07)                      | (0.56, 1.11)                                          | (0.56, 1.10)             |
|     | 1600                     | (0.40, 0.51, 0.49, 0.50)      | (0.42, 0.51, 0.51, 0.48)             | (0.41, 0.53, 0.53, 0.53)          | (0.40, 0.51, 0.51, 0.51)                              | (0.41, 0.51, 0.51, 0.51) |
|     | 800                      | (0.40, 0.53, 0.51, 0.53)      | (0.41, 0.51, 0.53, 0.53)             | (0.43, 0.52, 0.52, 0.52)          | (0.42, 0.52, 0.52, 0.52)                              | (0.42, 0.52, 0.52, 0.52) |
| 400 | (0.46, 0.54, 0.50, 0.54) | (0.47, 0.56, 0.51, 0.53)      | (0.43, 0.53, 0.54, 0.53)             | (0.44, 0.53, 0.55, 0.54)          | (0.44, 0.53, 0.56, 0.55)                              |                          |
| 200 | (0.39, 0.55, 0.55, 0.54) | (0.41, 0.54, 0.55, 0.54)      | (0.44, 0.53, 0.54, 0.55)             | (0.47, 0.61, 0.59, 0.60)          | (0.47, 0.60, 0.59, 0.58)                              |                          |

Table 1. Simulation results on comparing performance between fixed sample design, Koopmeiners & Vogel approach and the proposed two-stage design with  $m = n/2$ . True  $\beta$  is  $(0.5, 1)^T$  for  $k = 2$  and  $(0.4, 0.5, 0.5, 0.5)^T$  for  $k = 4$ .

| $k$               | $n$           | Fixed Sample         |               | Koopmeiners & Vogel  |               | Two-Stage Design with $m = 0.33n$ |                           |                            |                             |               |           |      |
|-------------------|---------------|----------------------|---------------|----------------------|---------------|-----------------------------------|---------------------------|----------------------------|-----------------------------|---------------|-----------|------|
|                   |               | $R\hat{O}C(0.2)(se)$ | # samples     | $R\hat{O}C(0.2)(se)$ | $\%(C = 1)$   | # samples                         | $R\hat{O}C_{at}(0.2)(se)$ | $R\hat{O}C_{s_2}(0.2)(se)$ | $R\hat{O}C_{cond}(0.2)(se)$ | $\%(C = 1)$   | # samples |      |
| $\gamma_0 = 0.55$ |               |                      |               |                      |               |                                   |                           |                            |                             |               |           |      |
| 2                 | 1600          | 0.590 (0.041)        | 1600          | 0.589 (0.035)        | 81.4          | 1451                              | 0.590 (0.028)             | 0.590 (0.034)              | 0.590 (0.027)               | 100.0         | 1600      |      |
|                   | 800           | 0.589 (0.057)        | 800           | 0.588 (0.050)        | 75.2          | 701                               | 0.592 (0.038)             | 0.591 (0.045)              | 0.592(0.037)                | 99.8          | 799       |      |
|                   | 400           | 0.586 (0.081)        | 400           | 0.584 (0.070)        | 71.2          | 342                               | 0.589 (0.052)             | 0.587 (0.062)              | 0.588 (0.049)               | 100.0         | 400       |      |
|                   | 200           | 0.582 (0.114)        | 200           | 0.577 (0.101)        | 69.1          | 169                               | 0.584 (0.072)             | 0.576 (0.088)              | 0.581 (0.069)               | 100.0         | 200       |      |
|                   | 4             | 1600                 | 0.587 (0.040) | 1600                 | 0.585 (0.035) | 83.4                              | 1467                      | 0.587 (0.027)              | 0.586 (0.033)               | 0.586 (0.026) | 100.0     | 1600 |
|                   |               | 800                  | 0.584 (0.058) | 800                  | 0.580 (0.050) | 78.9                              | 716                       | 0.588 (0.037)              | 0.585 (0.046)               | 0.585 (0.036) | 100.0     | 800  |
| 400               |               | 0.578 (0.081)        | 400           | 0.570 (0.073)        | 76.7          | 353                               | 0.575 (0.051)             | 0.570 (0.063)              | 0.569 (0.050)               | 100.0         | 400       |      |
| 200               | 0.566 (0.117) | 200                  | 0.551 (0.106) | 77.3                 | 177           | 0.569 (0.075)                     | 0.559 (0.090)             | 0.559 (0.072)              | 100.0                       | 200           |           |      |
| $\gamma_0 = 0.59$ |               |                      |               |                      |               |                                   |                           |                            |                             |               |           |      |
| 2                 | 1600          | 0.590 (0.041)        | 1600          | 0.589 (0.035)        | 46.9          | 1175                              | 0.591 (0.027)             | 0.591 (0.034)              | 0.590 (0.027)               | 99.2          | 1594      |      |
|                   | 800           | 0.589 (0.057)        | 800           | 0.588 (0.050)        | 48.6          | 594                               | 0.592 (0.038)             | 0.591 (0.045)              | 0.591 (0.037)               | 99.6          | 798       |      |
|                   | 400           | 0.586 (0.081)        | 400           | 0.584 (0.070)        | 52.9          | 306                               | 0.589 (0.051)             | 0.586 (0.062)              | 0.588 (0.049)               | 99.6          | 399       |      |
|                   | 200           | 0.582 (0.114)        | 200           | 0.578 (0.100)        | 56.5          | 157                               | 0.584 (0.072)             | 0.576 (0.088)              | 0.580 (0.069)               | 100.0         | 200       |      |
|                   | 4             | 1600                 | 0.587 (0.040) | 1600                 | 0.585 (0.035) | 49.4                              | 1195                      | 0.587 (0.027)              | 0.586 (0.033)               | 0.586 (0.027) | 98.7      | 1590 |
|                   |               | 800                  | 0.584 (0.058) | 800                  | 0.580 (0.050) | 54.4                              | 617                       | 0.588 (0.037)              | 0.585 (0.046)               | 0.585 (0.036) | 99.8      | 799  |
| 400               |               | 0.578 (0.081)        | 400           | 0.571 (0.073)        | 60.2          | 320                               | 0.576 (0.051)             | 0.570 (0.063)              | 0.569 (0.050)               | 99.0          | 398       |      |
| 200               | 0.566 (0.117) | 200                  | 0.551 (0.106) | 65.8                 | 166           | 0.569 (0.075)                     | 0.560 (0.090)             | 0.559 (0.072)              | 99.8                        | 199           |           |      |
| $\gamma_0 = 0.65$ |               |                      |               |                      |               |                                   |                           |                            |                             |               |           |      |
| 2                 | 1600          | 0.590 (0.041)        | 1600          | 0.588 (0.036)        | 12.8          | 902                               | 0.593 (0.027)             | 0.590 (0.034)              | 0.590 (0.028)               | 91.5          | 1532      |      |
|                   | 800           | 0.589 (0.057)        | 800           | 0.589 (0.050)        | 22.4          | 489                               | 0.593 (0.037)             | 0.591 (0.045)              | 0.591 (0.038)               | 98.0          | 792       |      |
|                   | 400           | 0.586 (0.081)        | 400           | 0.584 (0.070)        | 31.9          | 264                               | 0.590 (0.051)             | 0.586 (0.062)              | 0.588 (0.050)               | 97.9          | 396       |      |
|                   | 200           | 0.582 (0.114)        | 200           | 0.577 (0.100)        | 42.7          | 143                               | 0.584 (0.072)             | 0.576 (0.088)              | 0.580 (0.070)               | 99.7          | 199       |      |
|                   | 4             | 1600                 | 0.587 (0.040) | 1600                 | 0.586 (0.035) | 15.0                              | 920                       | 0.590 (0.027)              | 0.586 (0.033)               | 0.585 (0.028) | 89.2      | 1514 |
|                   |               | 800                  | 0.584 (0.058) | 800                  | 0.580 (0.050) | 26.5                              | 506                       | 0.590 (0.037)              | 0.585 (0.046)               | 0.585 (0.037) | 95.3      | 781  |
| 400               |               | 0.578 (0.081)        | 400           | 0.571 (0.072)        | 38.9          | 278                               | 0.577 (0.051)             | 0.569 (0.063)              | 0.569 (0.051)               | 95.6          | 391       |      |
| 200               | 0.566 (0.117) | 200                  | 0.552 (0.106) | 51.7                 | 152           | 0.570 (0.074)                     | 0.560 (0.090)             | 0.559 (0.072)              | 98.8                        | 199           |           |      |
| $\gamma_0 = 0.70$ |               |                      |               |                      |               |                                   |                           |                            |                             |               |           |      |
| 2                 | 1600          | 0.590 (0.041)        | 1600          | 0.587 (0.036)        | 1.3           | 810                               | 0.598 (0.027)             | 0.589 (0.034)              | 0.589 (0.031)               | 60.3          | 1282      |      |
|                   | 800           | 0.589 (0.057)        | 800           | 0.590 (0.050)        | 6.4           | 425                               | 0.597 (0.036)             | 0.591 (0.045)              | 0.591 (0.039)               | 86.4          | 746       |      |
|                   | 400           | 0.586 (0.081)        | 400           | 0.583 (0.070)        | 15.8          | 232                               | 0.591 (0.051)             | 0.585 (0.062)              | 0.587 (0.051)               | 93.8          | 388       |      |
|                   | 200           | 0.582 (0.114)        | 200           | 0.578 (0.100)        | 27.7          | 128                               | 0.586 (0.071)             | 0.577 (0.089)              | 0.581 (0.070)               | 98.0          | 198       |      |
|                   | 4             | 1600                 | 0.587 (0.040) | 1600                 | 0.585 (0.039) | 1.5                               | 812                       | 0.596 (0.026)              | 0.585 (0.032)               | 0.585 (0.029) | 56.4      | 1251 |
|                   |               | 800                  | 0.584 (0.058) | 800                  | 0.581 (0.051) | 8.3                               | 433                       | 0.594 (0.035)              | 0.585 (0.046)               | 0.585 (0.038) | 80.7      | 723  |
| 400               |               | 0.578 (0.081)        | 400           | 0.574 (0.070)        | 20.9          | 242                               | 0.580 (0.050)             | 0.569 (0.064)              | 0.569 (0.053)               | 89.2          | 378       |      |
| 200               | 0.566 (0.117) | 200                  | 0.553 (0.105) | 36.6                 | 137           | 0.573 (0.073)                     | 0.561 (0.090)             | 0.559 (0.073)              | 96.5                        | 197           |           |      |

Table 2. Simulation results on  $R\hat{O}C(0.2)$  comparing performance between fixed sample design, Koopmeiners & Vogel approach and the proposed two-stage design with  $m = 0.33n$ . True  $ROC(0.2)$  is 0.591 for  $k = 2$  and 0.590 for  $k = 4$ .
